# Supplementary figures and images for: A five-electrode capacitively coupled contactless conductivity detector with a low limit of detection
Source: Royal Society of Chemistry journal article supplement (doi:10.1039/d3ay00328k), 2023-01-01

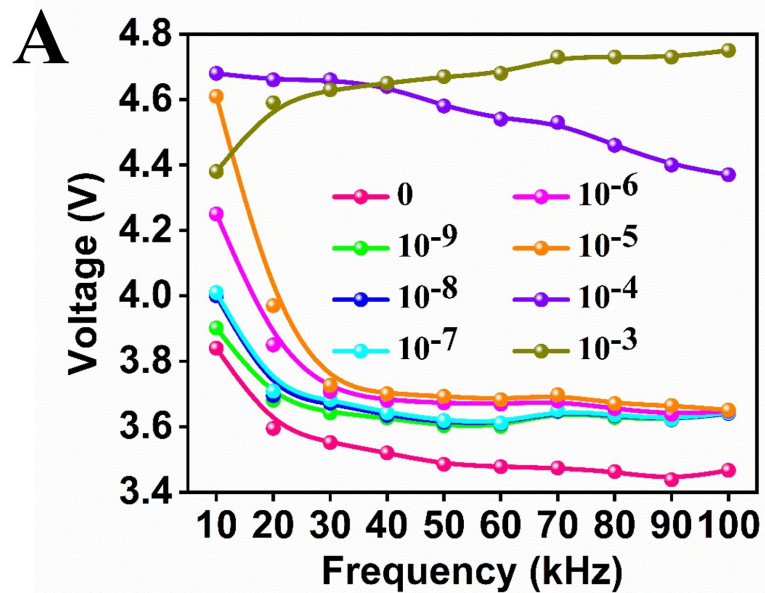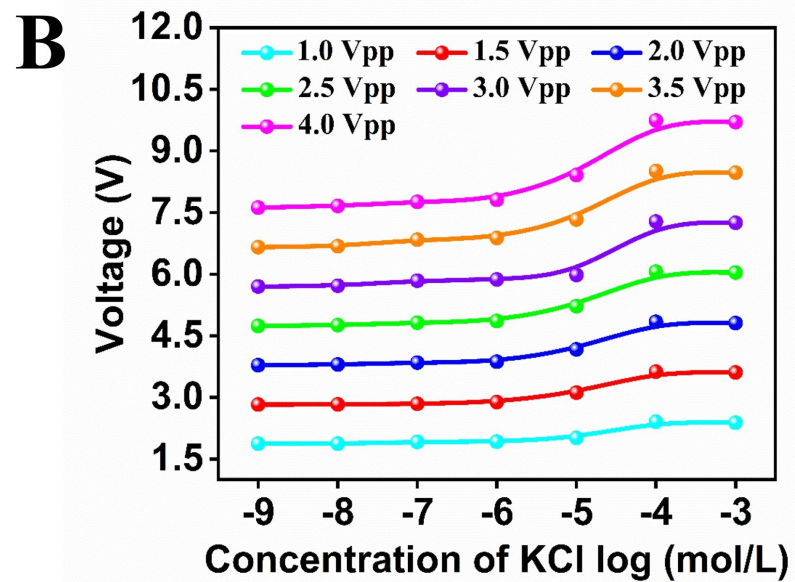

Supplement: d3ay00328k2.pdf [file d3ay00328k2.pdf]

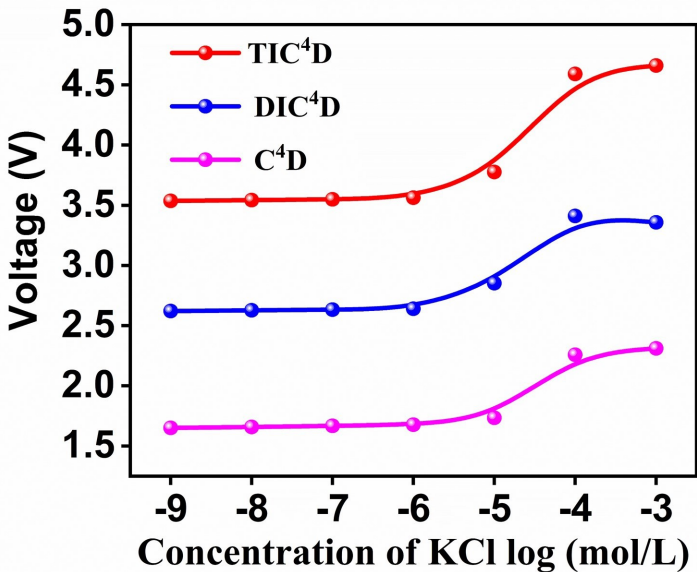

Supplement: d3ay00328k3.pdf [file d3ay00328k3.pdf]

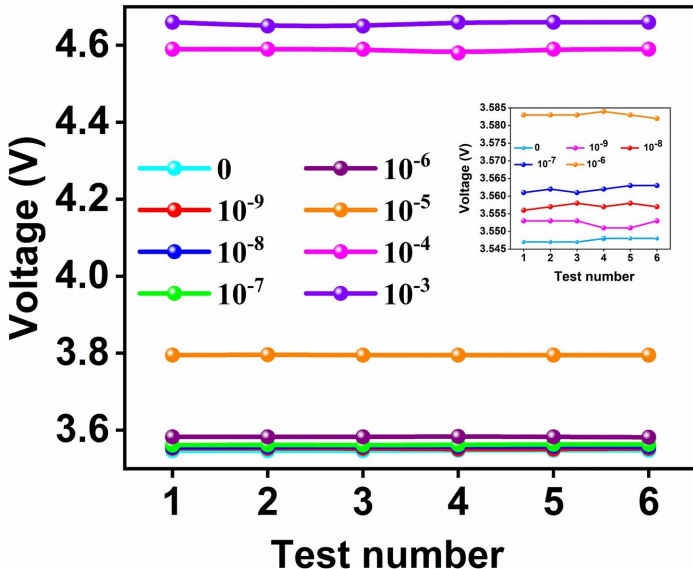

Supplement: d3ay00328k4.pdf [file d3ay00328k4.pdf]

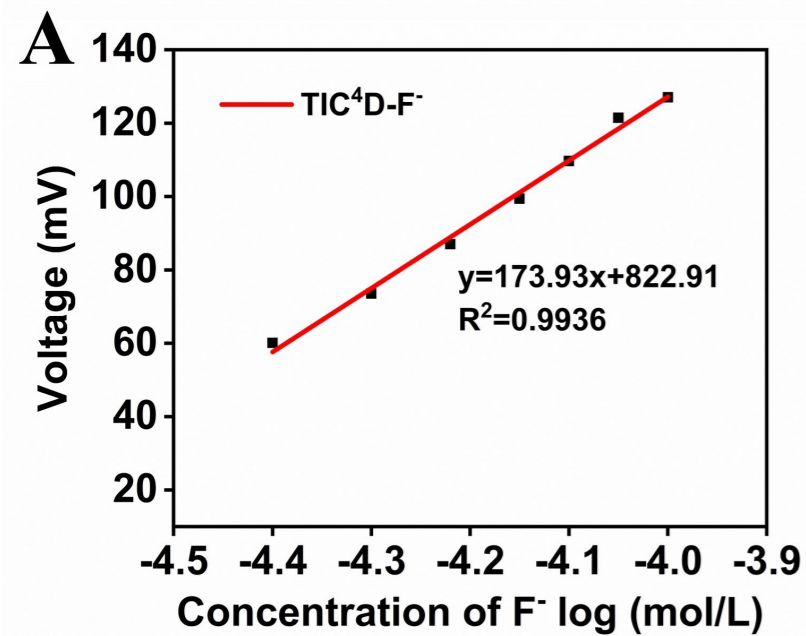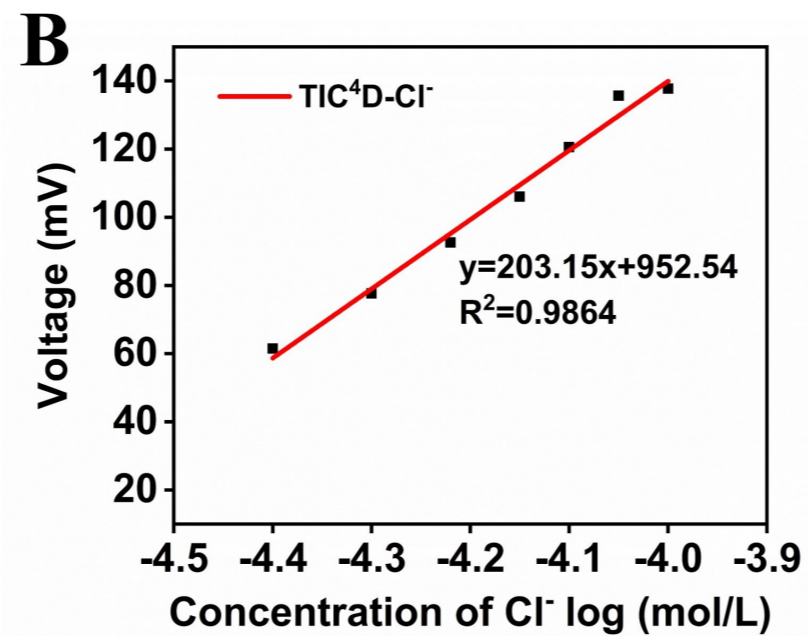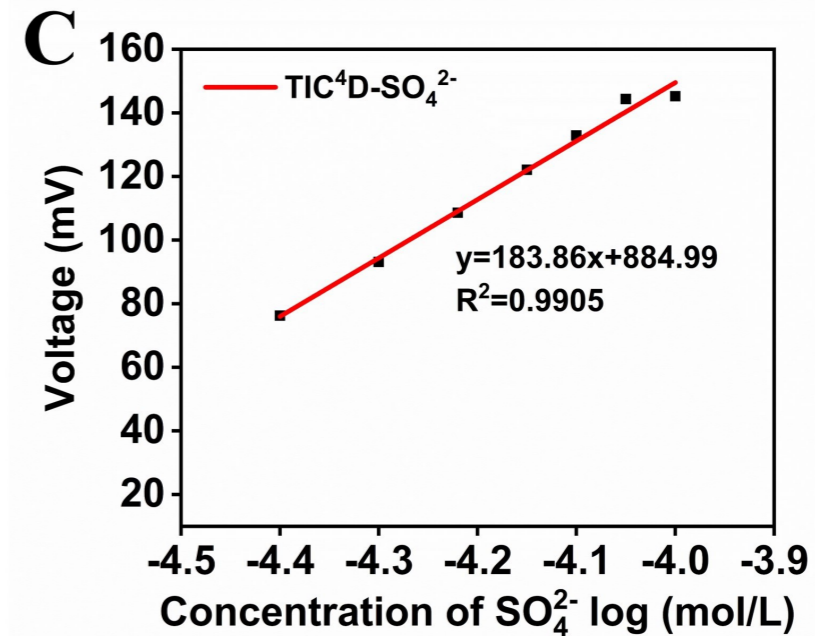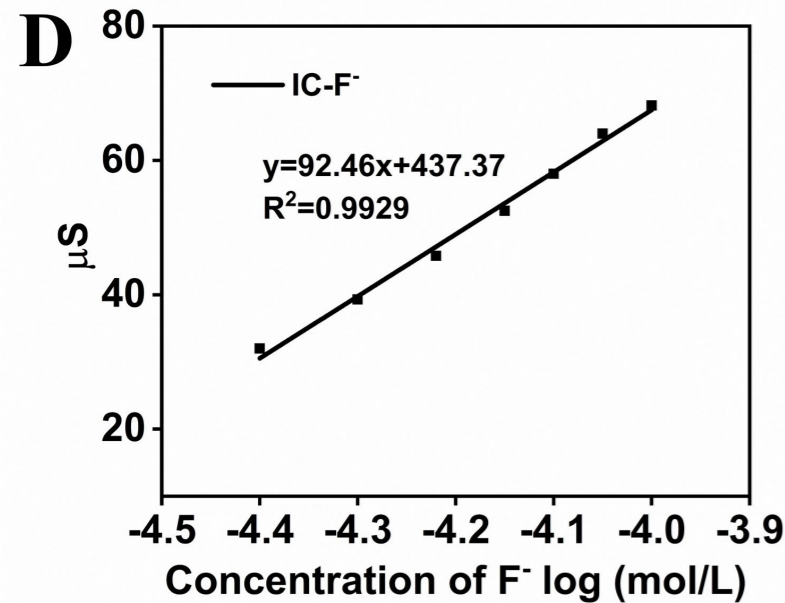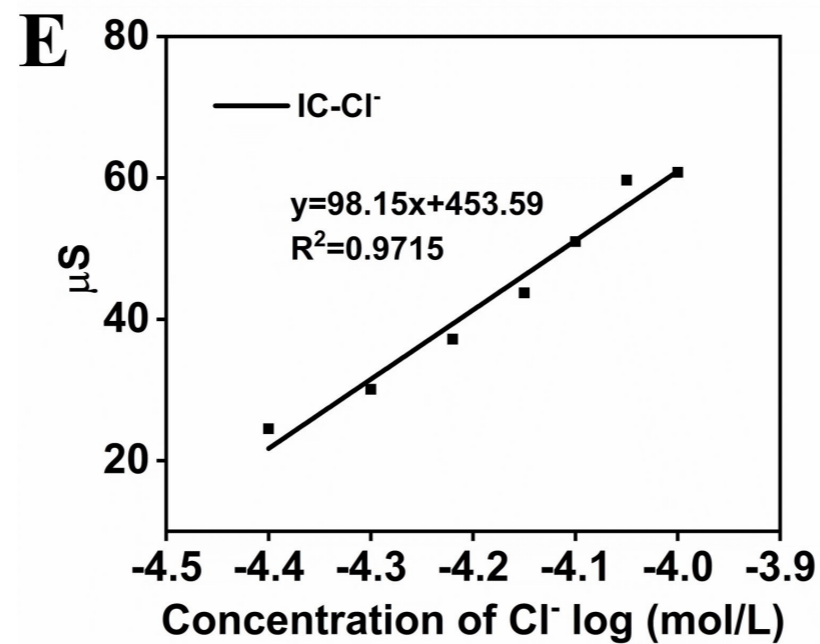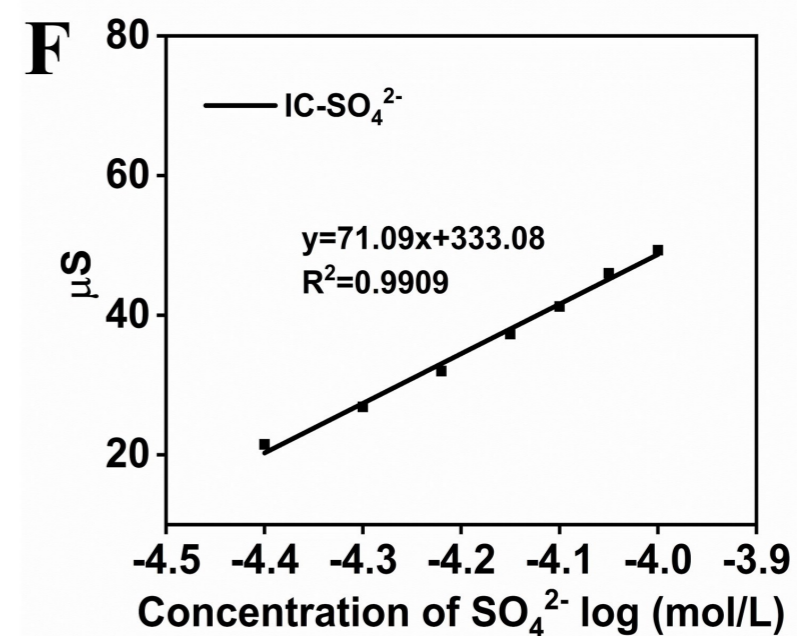

Supplement: d3ay00328k5.pdf [file d3ay00328k5.pdf]

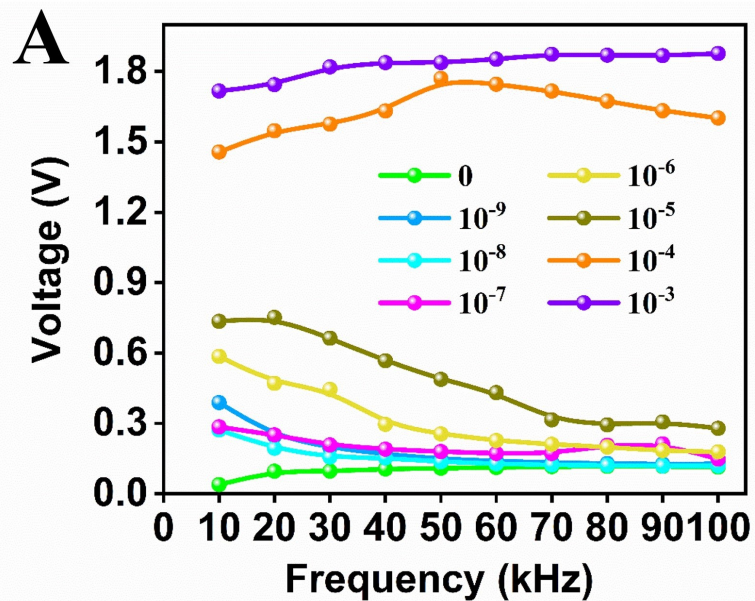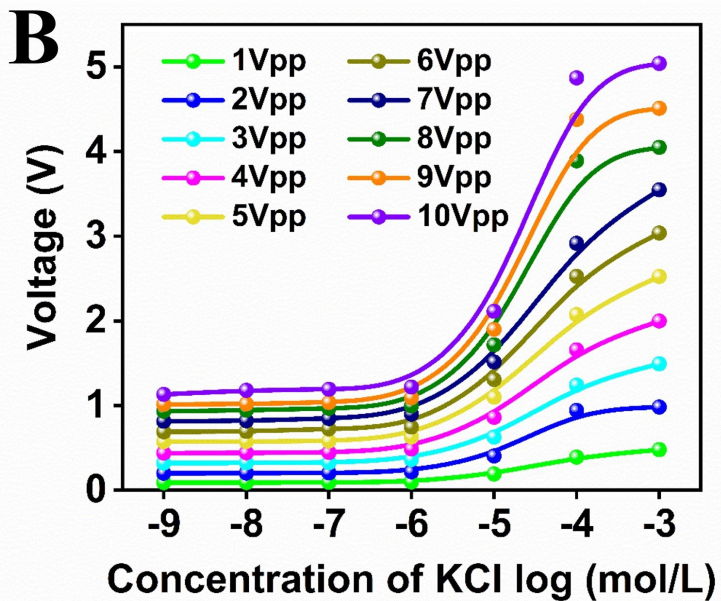

Supplement: d3ay00328k6.pdf [file d3ay00328k6.pdf]

**A**

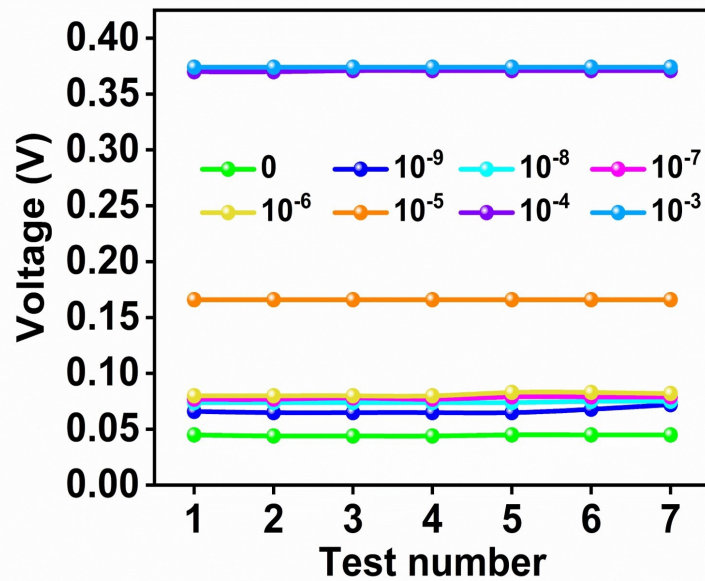

**B**

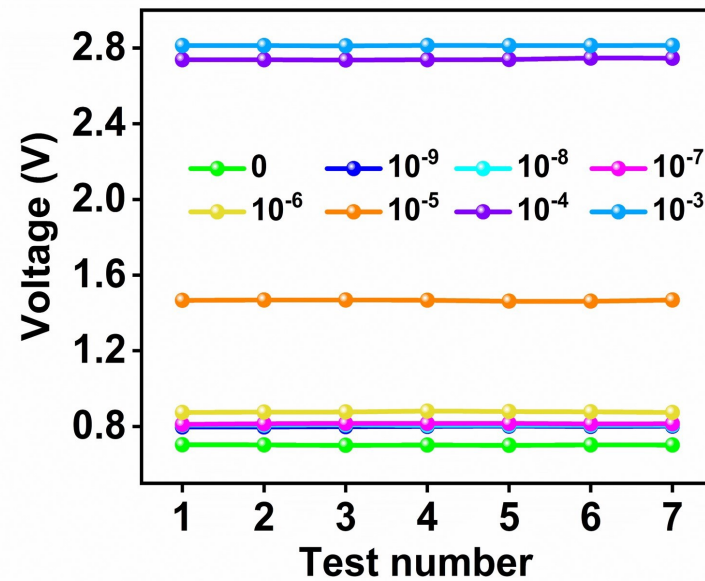

Supplement: d3ay00328k7.pdf [file d3ay00328k7.pdf]
